# Supplementary material
Source: publisher figshare collection journal article supplement (https://tandf.figshare.com/ndownloader/files/21202482)
Supplement: Supplementary file 1 [file 21202482]

# Variations in Rest-Activity Rhythm are associated with clinically measured disease severity in Parkinson's Disease

**SUPPLEMENTARY TABLE 1** – Number (%) of valid participant-days with less than 15% missing data\* by H&Y Stage and by day of the week.\*\*

|               | Sunday      | Monday     | Tuesday     | Wednesday   | Thursday    | Friday      | Saturday    | All          |
|---------------|-------------|------------|-------------|-------------|-------------|-------------|-------------|--------------|
| H&Y Stage 1/2 | 2 (100%)    | 0 (0%)     | 2 (100%)    | 2 (100%)    | 2 (100%)    | 2 (100%)    | 2 (100%)    | 12 (85.71%)  |
| H&Y Stage 2   | 6 (50%)     | 2 (16.67%) | 10 (83.33%) | 10 (83.33%) | 11 (91.67%) | 9 (75%)     | 7 (58.33%)  | 55 (65.48%)  |
| H&Y Stage 2/3 | 5 (83.33%)  | 0 (0%)     | 6 (100%)    | 6 (100%)    | 6 (100%)    | 5 (83.33%)  | 4 (66.67%)  | 32 (76.19%)  |
| H&Y Stage 3   | 4 (66.67%)  | 0 (0%)     | 4 (66.67%)  | 5 (83.33%)  | 5 (83.33%)  | 4 (66.67%)  | 3 (50%)     | 25 (59.52%)  |
| All           | 17 (65.38%) | 2 (7.69%)  | 22 (84.62%) | 23 (88.46%) | 24 (92.31%) | 20 (76.92%) | 16 (61.54%) | 124 (68.13%) |

\*Participant-days with greater than 15% of the activity data missing were not modelled with cosinors.

\*\*Note that the day of the week specifies the start day of the model (e.g. Sunday tabulates the cosinor models for Sunday 18:00:00 – Monday 17:59:45).

**SUPPLEMENTARY TABLE 2** – Cosinor parameters\*\* of the final analytical cohort and their associations\*\*\* with baseline characteristics.

|                                         | Age †          | BMI †          | MMSE †          | ESS †          | Levodopa †   | Sex †        | Handedness † |
|-----------------------------------------|----------------|----------------|-----------------|----------------|--------------|--------------|--------------|
| 95% CI                                  | [-2.43, -1.24] | [-2.71, -1.05] | [-5.52, -1.30]  | [-1.70, 0.26]  | [0.01, 0.03] | [0.93, 0.98] | [0.91, 0.97] |
| <b>MESOR</b> Coefficient/Odds Ratio     | -1.83          | -1.88          | -3.41           | -0.72          | 0.02         | 0.95         | 0.94         |
| p-value                                 | < 0.01*        | < 0.01*        | < 0.01*         | 0.15           | < 0.01*      | < 0.01*      | < 0.01*      |
| 95% CI                                  | [-2.28, -1.14] | [-2.48, -0.86] | [-6.08, -2.15]  | [-1.89, -0.03] | [0.01, 0.03] | [0.92, 0.98] | [0.91, 0.97] |
| <b>Amplitude</b> Coefficient/Odds Ratio | -1.71          | -1.67          | -4.11           | -0.96          | 0.02         | 0.95         | 0.94         |
| p-value                                 | < 0.01*        | < 0.01*        | < 0.01*         | 0.04*          | < 0.01*      | < 0.01*      | < 0.01*      |
| 95% CI                                  | [-1:48, 6:22]  | [-2:48, 8:03]  | [-29:04, -3:09] | [-8:43, 2:59]  | [0:02, 0:09] | --           | --           |
| <b>Acrophase</b> Coefficient/Odds Ratio | 2:17           | 2:37           | -16:07          | 2:52           | 00:05        |              |              |
| p-value                                 | 0.27           | 0.34           | 0.02*           | 0.33           | < 0.01*      |              |              |

\*\*Note that MESOR and Amplitude are reported in AC, and Acrophase in time (minute:second).

\*\*\*For all regressions, the sample analyzed contained both weeks had a total n = 124, and degrees of freedom of F(1, 122). Coefficients are reported as change in Cosinor Parameter per 1 MDS-UPDRS score.

Abbreviations: AC (Activity Count), CI (Confidence Interval), MESOR (Midline Estimating Statistic Of Rhythm), MDS-UPDRS (Movement Disorder Society's Unified Parkinson's Disease Rating Scale). \* = p < 0.05

† Simple Linear Regression, reporting coefficient

† Simple Logistic Regression, reporting odds ratio

## SUPPLEMENTARY FIGURE 1

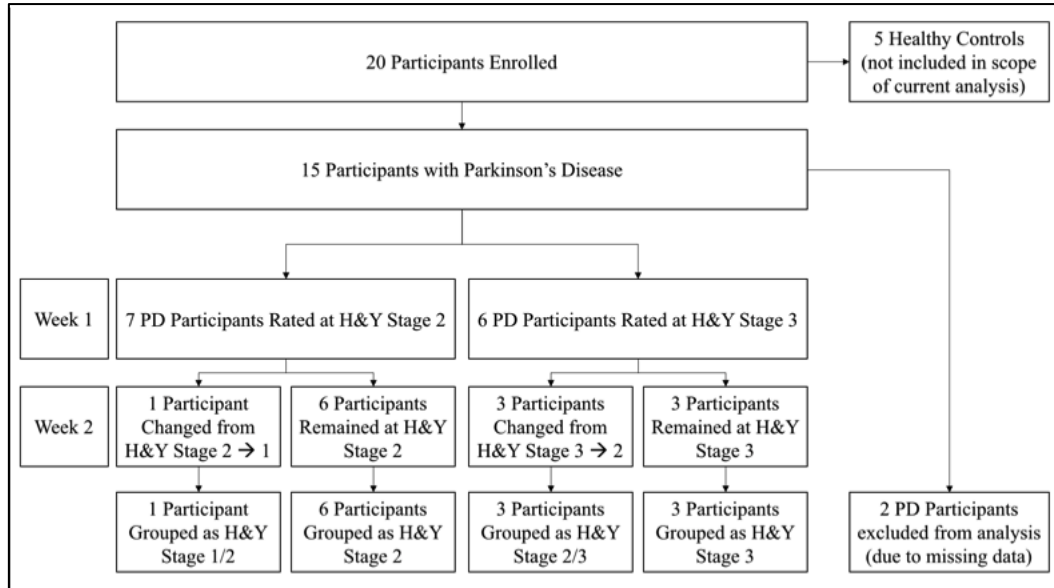

**SUPPLEMENTARY FIGURE 1** – Flow chart of participant inclusion and assignment to sub-groups based on Hoehn and Yahr (H&Y) Stage. Participants were rated by clinicians during an in-lab visit following each week of in-home recording. The two in-lab visits were an average of 36.31 (standard deviation: 4.80, range: [28 – 49]) days apart for the final analytical cohort (n = 13).
